# Supplementary material for: Capture and Detection of Circulating Glioma Cells Using the Recombinant VAR2CSA Malaria Protein
Source: MDPI journal article supplement (doi:10.3390/cells8090998), 2019-08-28

## Supplementary figure S6. *In vitro* EMT western blot

Uncropped images of western blots presented in figure 1B. Res259 cell lysates after 72 hour incubation with TGF- $\beta$  or buffer control. Membranes were incubated with anti- $\beta$ -catenin (92 kDa), anti-N-cadherin (140kDa), anti-vimentin (57 kDa) or anti-GAPDH (37 kDa) antibodies and detected by anti-rabbit HRP antibody. Detection of GAPDH served as a loading control.

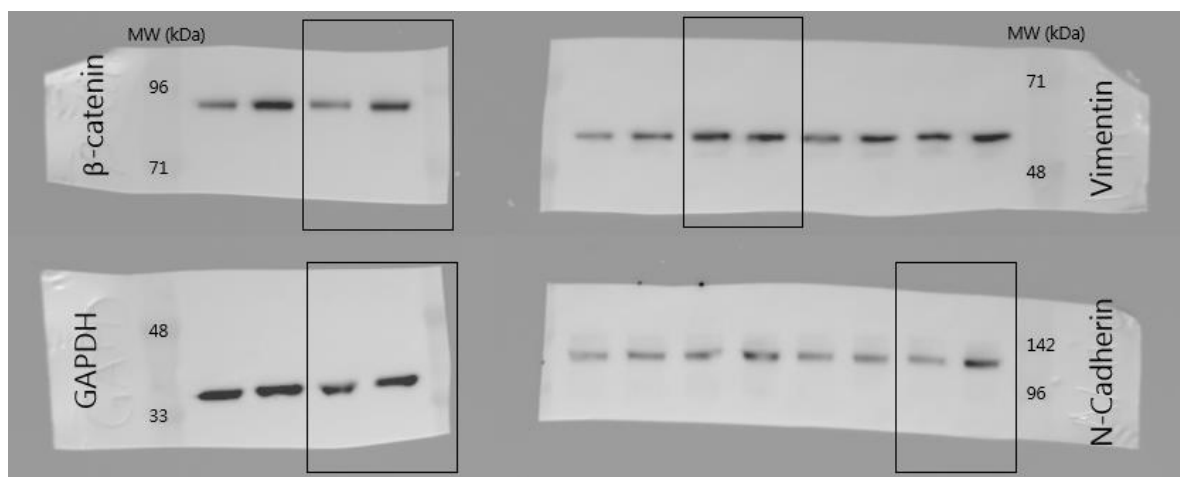

Supplement: s1 [file s1]
